# C<sub>4</sub> photosynthesis and climate through the lens of optimality

1  
2  
3  
4  
5  
6  
7  
8  
9  
10  
11  
12  
13  
14  
15  
16  
17  
18  
19  
20  
21  
22  
23  
24

Haoran Zhou<sup>\*†</sup>, Brent R. Helliker<sup>\*</sup> and Erol Akçay<sup>\*</sup>

<sup>\*</sup>Department of Biology, University of Pennsylvania, Philadelphia, PA 19104, USA

<sup>†</sup>*Correspondence:* Haoran Zhou

*Phone:* 1-215-808-7042

*Email:* [haoranzh@sas.upenn.edu](mailto:haoranzh@sas.upenn.edu)

Brent R. Helliker: [helliker@sas.upenn.edu](mailto:helliker@sas.upenn.edu)

Erol Akçay: [eakcay@sas.upenn.edu](mailto:eakcay@sas.upenn.edu)

**Statement of authorship:** HZ, BH and EA conceptualized the study. HZ and EA built the model, HZ and BH put the idea in a general evolutionary context, HZ performed the modeling work and analyzed output data. HZ wrote the first draft, BH and EA contributed substantially to revisions.

**Running title:** Selective pressures in C<sub>4</sub> grasses evolution

**Conflict of interest:** None declared.

**The type of article:** Regular research articles (research report)

**Classification:** biological science (major), evolution/ecology/plant biology (minor)

**Word count limitation:** Five and a half page (1 column for Fig. 1, 2, 3, 5 and 1.5 column for Fig.4) using Article Sizing Tool.

## 1 **Abstract**

2 CO<sub>2</sub>, temperature, water availability and light intensity were all potential selective pressures to  
3 propel the initial evolution and global expansion of C<sub>4</sub> photosynthesis over the last 30 million  
4 years. To tease apart how the primary selective pressures varied along this evolutionary  
5 trajectory, we coupled photosynthesis and hydraulics models while optimizing photosynthesis  
6 over stomatal resistance and leaf/fine-root allocation. We further examined the importance of  
7 resource (e.g. nitrogen) reallocation from the dark to the light reactions during and after the  
8 initial formation of C<sub>4</sub> syndrome. We show here that the primary selective pressures— all acting  
9 upon photorespiration in C<sub>3</sub> progenitors— changed through the course of C<sub>4</sub> evolution. The  
10 higher stomatal resistance and leaf-to-root allocation ratio enabled by the C<sub>4</sub>  
11 carbon-concentrating mechanism led to a C<sub>4</sub> advantage without any change in hydraulic  
12 properties, but selection on nitrogen reallocation varied. Water limitation was the primary driver  
13 for the initial evolution of C<sub>4</sub> 25-32 million years ago, and could positively select for C<sub>4</sub>  
14 evolution with atmospheric CO<sub>2</sub> as high as 600 ppm. Under these high CO<sub>2</sub> conditions, nitrogen  
15 reallocation was necessary. Low CO<sub>2</sub> and light intensity, but not nitrogen reallocation, were the  
16 primary drivers during the global radiation of C<sub>4</sub> 5-10 MYA. Finally, our results suggest that  
17 identifying the predominate selective pressures at the time C<sub>4</sub> first evolved within a lineage  
18 should help explain current biogeographical distributions.

19 **Keywords** C<sub>4</sub> evolution, optimal stomatal conductance, resource allocation, water limitation,  
20 selective pressure, dark/light reaction

## 21 22 **Significance Statement**

23 C<sub>4</sub> photosynthesis pathway had evolved more than 60 times independently across the terrestrial  
24 plants through mid-Oligocene (~30 MYA) and diversified at late Miocene (5 to 10 MYA). We  
25 use an optimal physiology model to examine the primary selective pressures along the  
26 evolutionary history. Water limitation was the primary driver for C<sub>4</sub> evolution from the initial  
27 evolutionary events 25 -32 MYA until CO<sub>2</sub> became low enough to, along with light intensity,

- 1 drive the global radiation of C<sub>4</sub> 5-10 MYA. This modeling framework can be used to investigate
- 2 evolution of other physiological traits (e.g. N reallocation, hydraulics) after the initial formation
- 3 of C<sub>4</sub> syndrome, which contributed to further increasing productivity of C<sub>4</sub> in historical and
- 4 current environmental conditions.

## 1 **Introduction**

2 The evolution of the C<sub>4</sub> photosynthetic pathway enabled the concentration of CO<sub>2</sub> around  
3 Rubisco, the enzyme responsible for the first major step of carbon fixation in the C<sub>3</sub>  
4 photosynthetic pathway, thus eliminating photorespiration. C<sub>3</sub> photosynthesis is present in all  
5 plants, and within C<sub>4</sub> plants the C<sub>3</sub> pathway is typically ensconced within specialized bundle  
6 sheath cells that surround leaf veins. CO<sub>2</sub> that diffuses into a leaf is shuttled from adjacent  
7 mesophyll cells to the bundle sheath via a four-carbon pump, the energetic cost of which is  
8 remunerated by ATP derived from the light reactions (1, 2). As a whole, the C<sub>4</sub> pathway  
9 eliminates photorespiration, a process that can dramatically reduce photosynthesis and begins  
10 with the assimilation of O<sub>2</sub>, instead of CO<sub>2</sub>, by Rubisco. Over the last 30 million years, the  
11 reduction in C<sub>3</sub> photosynthesis by photorespiration was large and broad enough to select for the  
12 independent evolution of the C<sub>4</sub> pathway more than 60 times across the terrestrial plants (3). The  
13 diversity of plant families with C<sub>4</sub> is greatest in the eudicots (1200 species) and the Poaceae, the  
14 monocot family containing the grasses (4500 species) (2), account for nearly 25% of terrestrial  
15 plant productivity and several important agricultural species (4).

16  
17 While increased photorespiration in C<sub>3</sub> progenitors was central to the evolution of the C<sub>4</sub> carbon  
18 concentrating mechanism (CCM), the relative importance of different environmental drivers of  
19 the photorespiratory increase has been the subject of much debate (5, 6, 7, 8). Lower CO<sub>2</sub> leads  
20 to higher rates of photorespiration, as does higher temperature. Past physiological models  
21 therefore focused on examining temperature and CO<sub>2</sub> concentration as selective pressures for C<sub>4</sub>  
22 evolution and expansion (5, 9, 10). Under warmer temperatures and low CO<sub>2</sub>, C<sub>4</sub> photosynthesis  
23 has greater carbon gain than C<sub>3</sub>, but under cooler temperatures and high CO<sub>2</sub>, the metabolic costs  
24 of the C<sub>4</sub> pathway and lower photorespiration in C<sub>3</sub> leads to greater carbon gain in C<sub>3</sub>.  
25 Alternatively, water availability has been proposed as the impetus for C<sub>4</sub> evolution in eudicots  
26 (2), and recent phylogenetic analyses have suggested the same in grasses (7, 13). Water  
27 availability should have an impact on C<sub>4</sub> evolution that could work independently or in concert

1 with changes in CO<sub>2</sub> and temperature. First, water deficits indirectly increase photorespiration in  
2 C<sub>3</sub> plants by forcing stomatal closure to reduce leaf water loss; consequently decreasing the flux  
3 of CO<sub>2</sub> into the leaf and the availability of CO<sub>2</sub> for Rubisco. Second, the C<sub>4</sub> carbon concentrating  
4 mechanism allows for the maintenance of lower stomatal conductance, and therefore lower water  
5 loss, for a given assimilation rate; leading to a higher water-use-efficiency (WUE) than C<sub>3</sub> (11,  
6 12).

7  
8 The different environmental drivers of the photorespiratory increase in C<sub>3</sub> plants—atmospheric  
9 CO<sub>2</sub> concentration, temperature and water availability— have changed dramatically as C<sub>4</sub>  
10 photosynthesis has evolved over the last 30 million years. Atmospheric CO<sub>2</sub> decreased  
11 monotonically from the mid-Oligocene (680 ± 200 ppm) to the early Miocene (357 ± 108 ppm)  
12 down to the Pleistocene minima, where CO<sub>2</sub> oscillated between approximately 180 and 280 ppm  
13 through glacial/interglacial cycles (14). Physiological models that focused on temperature and  
14 CO<sub>2</sub> implied that C<sub>4</sub> evolved, in both grasses and eudicots, at the low end of this CO<sub>2</sub> range in  
15 the mid- Miocene to the Pleistocene (2, 5, 9, 10, 15). C<sub>4</sub> grasses did become a major component  
16 of grassland biomes— in terms of biomass, C<sub>4</sub> lineage diversity, or herbivore dietary  
17 components— in the late Miocene (5 to 10 MYA), but molecular evidence suggests that C<sub>4</sub>  
18 photosynthesis arose in the grasses in the mid-Oligocene (~30 MYA) (16). Similarly,  
19 phylogenetic reconstructions provide evidence that eudicots of the Chenopodiaceae evolved C<sub>4</sub>  
20 as early as the monocots, but saw the greatest rate of C<sub>4</sub> evolution and diversification in the late  
21 Miocene (17, 18, 19). Along with CO<sub>2</sub>, precipitation declined over the period of C<sub>4</sub> evolution and  
22 diversification, leading to vast terrestrial areas where low or highly seasonal precipitation inputs  
23 led to the loss of forests and consequently, the evolution of the world's first grasslands (20, 21).  
24 The spread of grasslands indicate a habitat change with larger surface radiation loads, higher  
25 surface temperatures and increased potential for plant water loss (6, 22). Therefore, the early  
26 evolution of C<sub>4</sub> suggested by molecular phylogenies indicates that water availability played an  
27 important role for both C<sub>4</sub> grasses and eudicots while CO<sub>2</sub> was still relatively high (6, 18, 23, 24,

1 22, 25). The potentially interacting roles of water availability, changes in radiation and CO<sub>2</sub>  
2 along the evolutionary trajectory of C<sub>4</sub> photosynthesis have not been fully investigated within a  
3 comprehensive physiological model.

4  
5 A related but largely unstudied evolutionary change during the divergence of C<sub>4</sub> photosynthesis  
6 from C<sub>3</sub> is the allocation of nutrients/resources (e.g. N considering enzymes and proteins)  
7 between the dark reactions and the light reactions. C<sub>4</sub> plants might allocate a greater proportion  
8 of N to light reactions than to dark reactions as compared to C<sub>3</sub> because of the extra ATP costs of  
9 the CCM (26, 27). We propose that the reallocation of N between dark and light reactions  
10 provides a further advantage for C<sub>4</sub> above the CCM alone, and that different environmental  
11 conditions can select for a shift in the degree of reallocation both through evolutionary time and  
12 across species in extant plants.

13  
14 Changes in the environmental controls on photorespiration suggest that multiple environmental  
15 drivers interacted to differing degrees along the trajectory of C<sub>4</sub> evolution. Our goal here is to  
16 tease apart the selective pressures that led to the evolution of C<sub>4</sub> photosynthesis initially and the  
17 global expansion 5-10 MYA through to the current day. We use the framework of an optimality  
18 model in which the plant makes allocation “decisions” in order to maximize photosynthetic  
19 assimilation rate. Our approach advances our understanding of C<sub>4</sub> evolution in four important  
20 ways. First, we revisit the temperature-CO<sub>2</sub> crossover approach and integrate the effects of water  
21 limitation, light, optimal allocation decisions, and the interactions between these in a single  
22 model. Second, the hypothesis that C<sub>4</sub> photosynthesis has a higher WUE than C<sub>3</sub> implicitly relies  
23 on an optimality argument to balance carbon gain and water loss (28), yet the role of optimal  
24 stomatal conductance in mediating selective pressures due to water limitation during the  
25 evolution of C<sub>4</sub> plants remains largely unexplored (but see 15). Most previous models assume *a*  
26 *priori* that C<sub>4</sub> grasses have lower stomatal conductance. Instead, we let both stomatal  
27 conductance and leaf/fine-root allocation emerge endogenously from the model. Third, we use

1 the C<sub>4</sub> model including cost of the C<sub>4</sub> pathway in the light reactions (2 additional ATP per CO<sub>2</sub>  
2 fixed; 1, 29), which previous modeling analysis did not explicitly consider (9, 22, 30, 31).  
3 Finally, we consider reallocation of nitrogen from the dark reactions to the light reactions, which  
4 can change the tradeoffs between photosynthesis and water use by C<sub>4</sub> grasses.

5

## 6 **Results**

7 Assimilation-based crossover temperatures, defined as the temperature at which assimilation by  
8 the C<sub>4</sub> pathway exceeds that of the C<sub>3</sub> pathway, decrease as water limitation increases and light  
9 intensity increases across all CO<sub>2</sub> concentrations (Fig. 1, Fig. S1). Without water stress (solid  
10 black line in Fig 1), our model predicts a C<sub>3</sub>/C<sub>4</sub> crossover temperature of 23°C under 380 ppm; a  
11 result similar to previous data and/or models that did not explicitly account for water stress (9,  
12 10, 32). The model results in Fig. 1 were all under saturated light and with a C<sub>4</sub>  $J_{max}/V_{cmax}$  ratio of  
13 4.5, which corresponds to a full reallocation of nitrogen from light to dark reactions. Model  
14 results for a C<sub>4</sub>  $J_{max}/V_{cmax}$  ratio of 2.1 (corresponding to no reallocation) were similar (Fig. S1a)  
15 with the primary exception being that under low CO<sub>2</sub> and low water availability (e.g. CO<sub>2</sub>=300  
16 ppm, VPD = 3 kPa and  $\Psi_s = -1.5$  MPa or all CO<sub>2</sub> concentrations with higher VPD and lower  
17  $\Psi_s$ ), crossover temperatures are higher with  $J_{max}/V_{cmax} = 4.5$ , showing that nitrogen reallocation  
18 decreases the C<sub>4</sub> advantage under water limitation and low CO<sub>2</sub>. Under saturated soil and low  
19 VPD, crossover temperatures decrease along with increasing light intensity (Fig. S1c, d). An  
20 increase in light intensity provides a larger relative benefit for C<sub>4</sub> at low CO<sub>2</sub>, because C<sub>3</sub>  
21 photosynthesis remains CO<sub>2</sub> limited throughout while C<sub>4</sub> light limitations lessen as light  
22 increases.

23

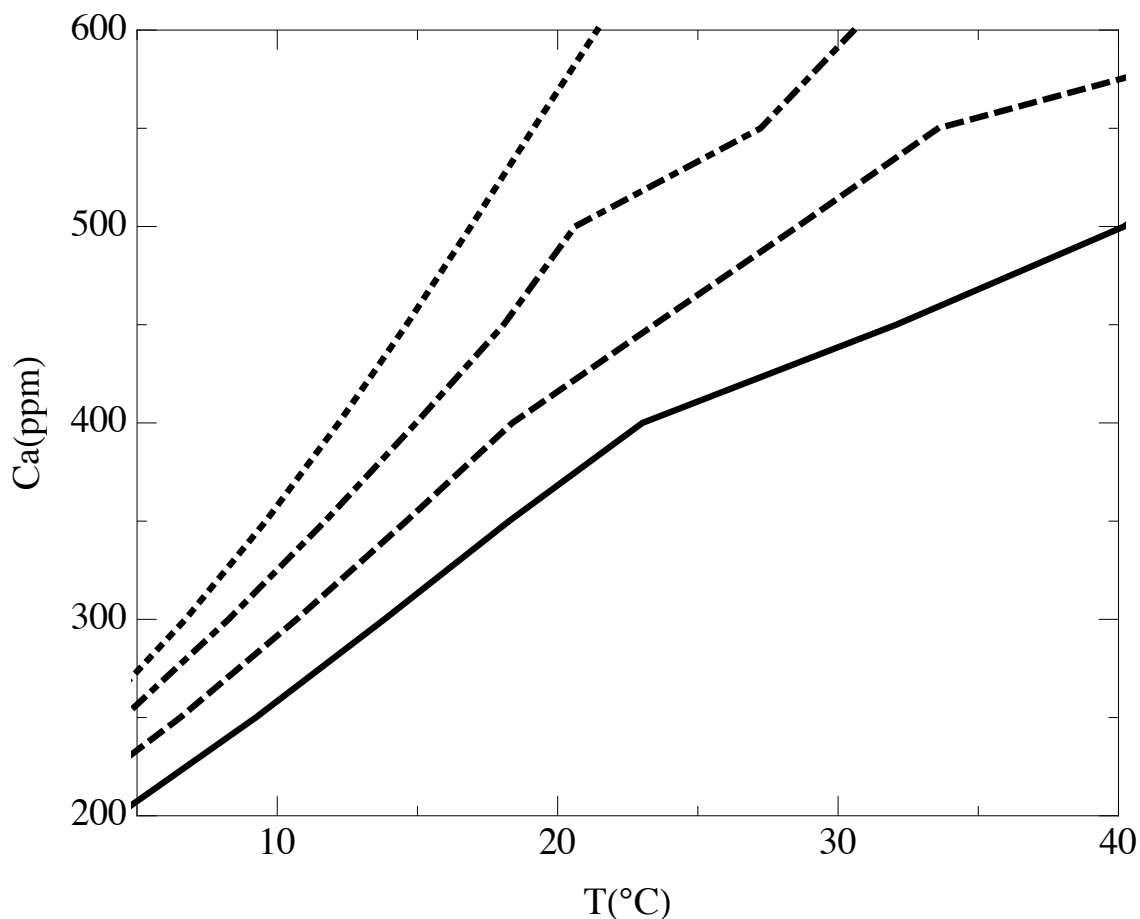

1  
2 Fig. 1. Crossover temperatures of photosynthesis for C<sub>3</sub> and C<sub>4</sub> with the change of CO<sub>2</sub> concentration  
3 under different water conditions. Light intensity was 1400 μmol photons m<sup>-2</sup>s<sup>-1</sup> for all model runs.  
4  $J_{\max}/V_{\text{cmax}}=2.1$  for C<sub>3</sub> and  $J_{\max}/V_{\text{cmax}}=4.5$  for C<sub>4</sub>. Solid black line: VPD=0.15kPa,  $\Psi_s=0$  MPa; dashed black  
5 line: VPD=1kPa,  $\Psi_s=-0.5$  MPa; dot-dashed black line: VPD=2kPa,  $\Psi_s=-1$  MPa; dotted black line:  
6 VPD=3 kPa,  $\Psi_s=-1.5$  MPa.

7  
8 While crossover temperatures allow for a clear diagnostic of comparative assimilation, they do  
9 not demonstrate the degree of C<sub>4</sub> photosynthetic advantage. To this end, we calculated the net  
10 assimilation rate difference between C<sub>4</sub> and C<sub>3</sub>,  $\Delta A_n$  (net assimilation of C<sub>4</sub> minus that of C<sub>3</sub>), to  
11 comprehensively examine the whole suite of environmental conditions (Fig. 2, 3). The positive  
12 contour space ( $\Delta A_n > 0$ ) means that C<sub>4</sub> outcompetes C<sub>3</sub> within given environmental dimensions,  
13 and the higher the  $\Delta A_n$ , the greater the advantage of C<sub>4</sub>. Under a CO<sub>2</sub> concentration of 200 ppm



1 and saturated light,  $\Delta A_n$  is higher under moist conditions than water-limited conditions (Fig. 2a,  
2 b). In contrast, under higher CO<sub>2</sub> concentrations (400 and 600 ppm), C<sub>4</sub> has the greatest  
3 advantage only in water-limited conditions, which leaves a relatively small environmental  
4 envelope for C<sub>4</sub> to evolve (areas where  $\Delta A_n > 0$  in Fig. 2c-f). This result is due to the fact that C<sub>3</sub>  
5 photosynthesis has a greater proportional increase in assimilation from 200 to 400 and 600 ppm  
6 CO<sub>2</sub>. Across all scenarios, increasing  $J_{max}/V_{cmax}$  increases both the  $\Delta A_n$  and space for C<sub>4</sub>  
7 advantage (Fig. 2 b, d, f). At 200 ppm and saturated soils,  $\Delta A_n$  is highest under saturated light,  
8 and decreases as light intensity decreases (Fig. 3a, b). At 400 ppm CO<sub>2</sub> and higher,  $\Delta A_n$   
9 indicated a C<sub>4</sub> advantage ( $\Delta A_n > 0$ ) only when light intensities were above 1000 mmol m<sup>-2</sup> s<sup>-1</sup>,  
10 temperature was above 30 °C and  $J_{max}/V_{cmax}$  was high (Fig. 3 c, d). Finally, we calculated the  
11 photosynthesis rates of the two pathways under conditions often encountered in today's  
12 grasslands to look at the effect of nitrogen reallocation (Fig. 4). With  $J_{max}/V_{cmax} = 2.1$  for both C<sub>3</sub>  
13 (solid black line) and C<sub>4</sub> (dashed line), the C<sub>4</sub> assimilation rate is rarely higher than C<sub>3</sub>, which  
14 indicates C<sub>4</sub> does not have an obvious advantage under current CO<sub>2</sub> from saturated soils down to  
15 VPD = 2 kPa and  $\Psi_s = -1$  MPa. However, with  $J_{max}/V_{cmax} = 4.5$  for C<sub>4</sub> (dotted line), C<sub>4</sub> does have  
16 an advantage over C<sub>3</sub> at temperatures above 25 °C.

17

18

19

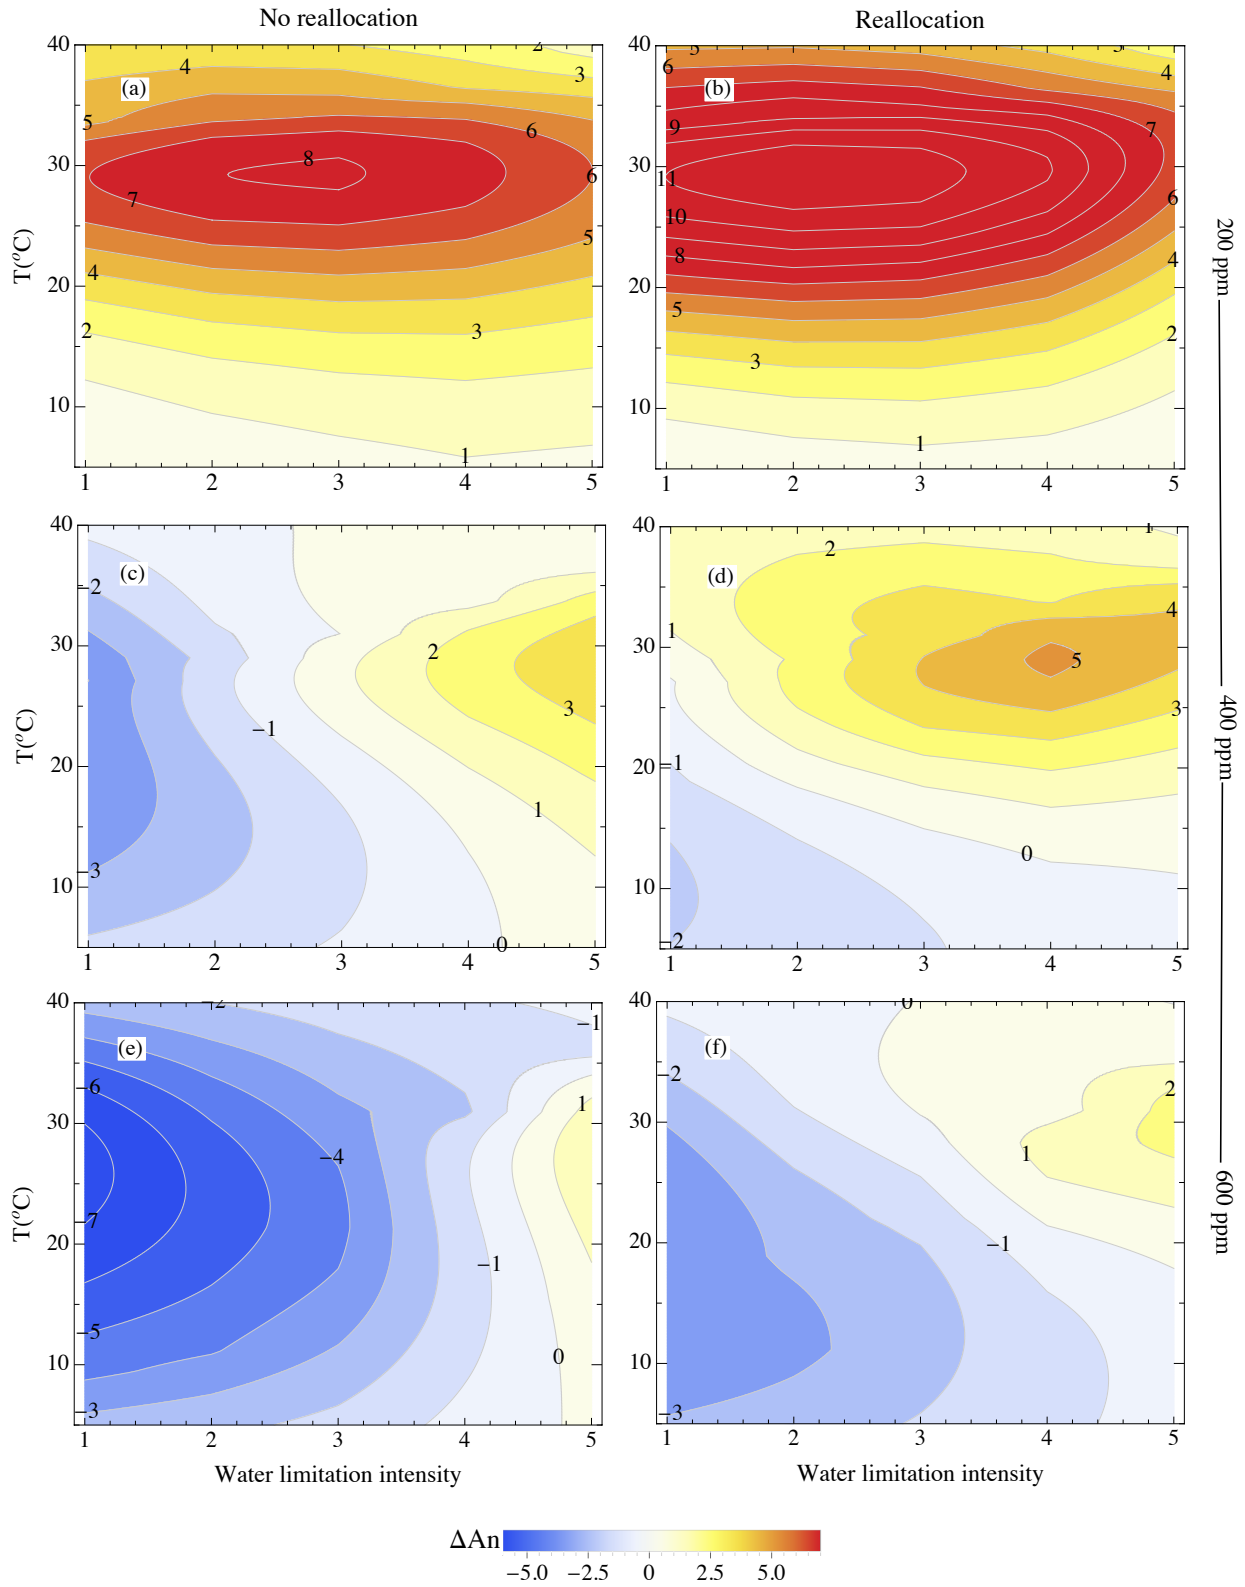

1

2 Fig. 2. The total difference in CO<sub>2</sub> assimilation between C<sub>4</sub> and C<sub>3</sub> ( $A_n(C_4) - A_n(C_3)$ ) under various CO<sub>2</sub>

1 (200 ppm, 400 ppm and 600 ppm) and water conditions under saturated light intensity (1400  $\mu\text{mol}$   
 2 photons  $\text{m}^{-2}\text{s}^{-1}$ ).  $J_{\text{max}}/V_{\text{cmax}}=2.1$  for  $C_3$  and  $C_4$  (a, c, e) and  $J_{\text{max}}/V_{\text{cmax}}=2.1$  for  $C_3$  and  $J_{\text{max}}/V_{\text{cmax}}=4.5$  for  $C_4$   
 3 (b, d, f). Water limitation intensity is: 1: VPD = 0.15 kPa,  $\Psi_s=0$  MPa; 2: 1.5 kPa, -0.5MPa; 3: 2kPa, -1  
 4 MPa; 4: 3kPa, -1.5 MPa; 5: 4kPa, -2 MPa.

5  
 6

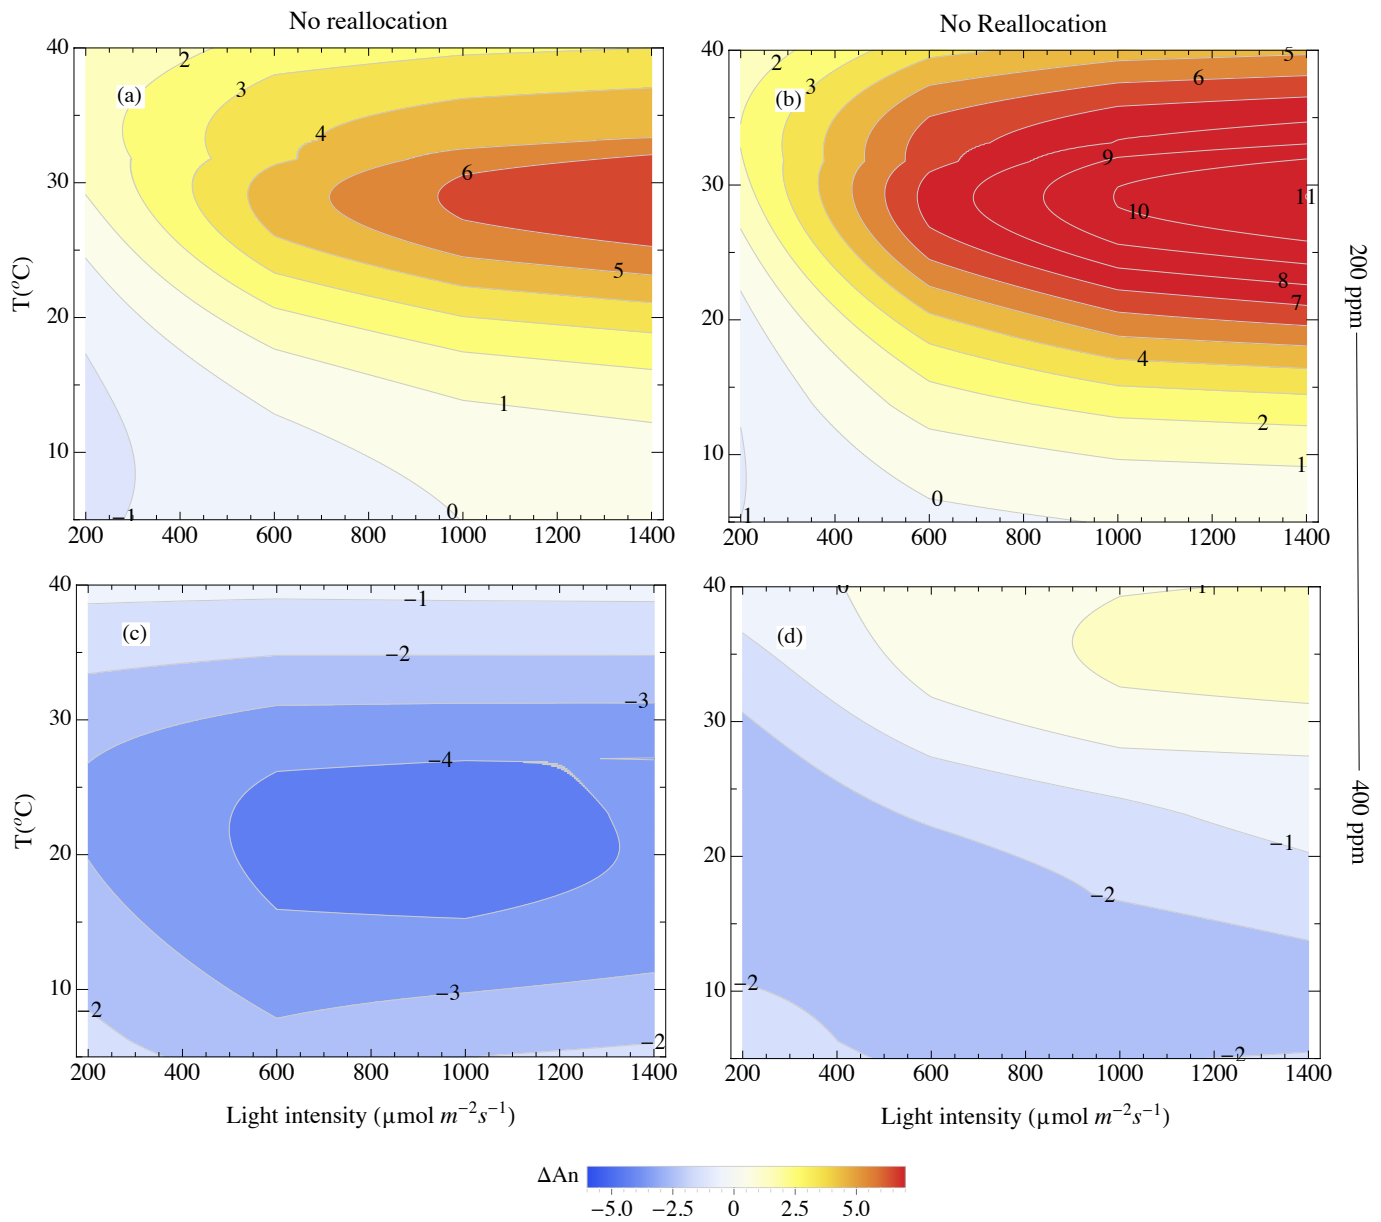

7

1 Fig. 3. The total difference in CO<sub>2</sub> assimilation between C<sub>4</sub> and C<sub>3</sub> ( $A_n(C_4)-A_n(C_3)$ ) with  $J_{max}/V_{cmax}=2.1$  for  
 2 C<sub>3</sub> and C<sub>4</sub> under various CO<sub>2</sub> (200 ppm, 400 ppm) and different light intensities (from 200 to 1400  $\mu\text{mol}$   
 3 photons  $\text{m}^{-2}\text{s}^{-1}$ ) with saturated water condition (VPD=0.15kPa,  $\Psi_s=0$  MPa) (a, c) and with  $J_{max}/V_{cmax}=2.1$   
 4 for C<sub>3</sub> and  $J_{max}/V_{cmax}=4.5$  for C<sub>4</sub> (b, d).

5

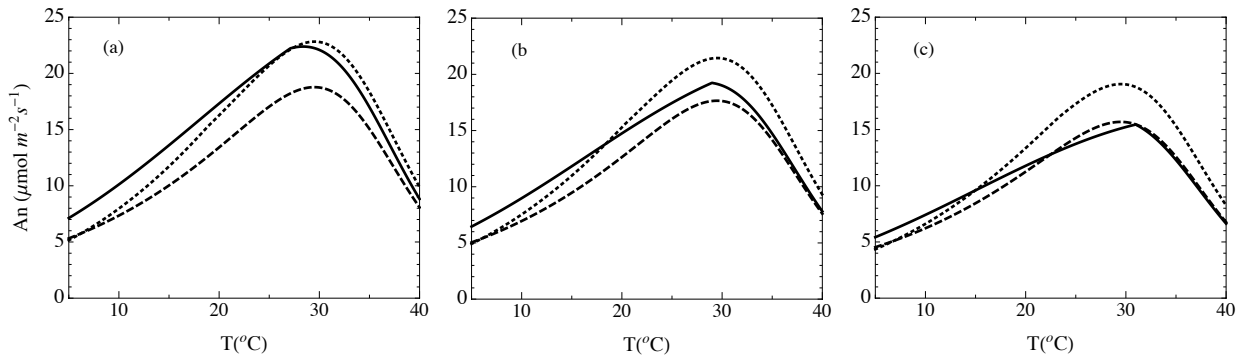

6

7 Fig. 4. Assimilation rates of C<sub>3</sub> with  $J_{max}/V_{cmax}=2.1$  (solid black line), C<sub>4</sub> with  $J_{max}/V_{cmax}=2.1$  (dashed  
 8 black line) and C<sub>4</sub> with  $J_{max}/V_{cmax}=4.5$  (dotted black line) under light intensity of 1400  $\mu\text{mol}$  photons  
 9  $\text{m}^{-2}\text{s}^{-1}$ , CO<sub>2</sub> of 400 ppm and different water limitation conditions. (a) saturated soils; (b) VPD=1kPa and  
 10  $\Psi_s=-0.5$  MPa; (c) VPD=2kPa and  $\Psi_s=-1$  MPa.

11

12 Under all environmental and nitrogen allocation scenarios, optimal stomatal resistance ( $r_s$ ) and  
 13 leaf biomass/total biomass allocation ( $f$ ) are higher in C<sub>4</sub> plants than C<sub>3</sub> plants. The general  
 14 pattern of response was similar across CO<sub>2</sub> concentrations, so only 400 ppm is presented with  
 15 both highest and lowest water availability (Fig. 5 and Fig. S2). Optimal  $f$  and  $r_s$  for C<sub>3</sub> is always  
 16 lower than that for C<sub>4</sub> under different water availability and CO<sub>2</sub> (Fig. 5). In addition,  $f$  decreases  
 17 and  $r_s$  increases as intensity of water limitation increases. Results are the consistent for C<sub>4</sub> with a  
 18  $J_{max}/V_{cmax}$  of 2.1 and  $J_{max}/V_{cmax}$  of 4.5. The jumps in  $r_s$  and  $f$  in Fig. 5 correspond to the transition  
 19 from RuBP carboxylation limited assimilation to RuBP regeneration limited assimilation ( $A_j$ ).  
 20 The transition temperature decreases as CO<sub>2</sub> increases. In the Fig. S3, the various limitation  
 21 states are plotted together under multiple environmental scenarios, using both  $J_{max}/V_{cmax}=2.1$  and  
 22 4.5 for C<sub>4</sub>. With  $J_{max}/V_{cmax}=2.1$ , C<sub>4</sub> is light limited in most of the environmental conditions. With

1  $J_{max}/V_{cmax}=4.5$ ,  $C_4$  starts to be limited by  $CO_2$  under low temperatures and to be limited by light  
 2 under high temperatures.

3

4

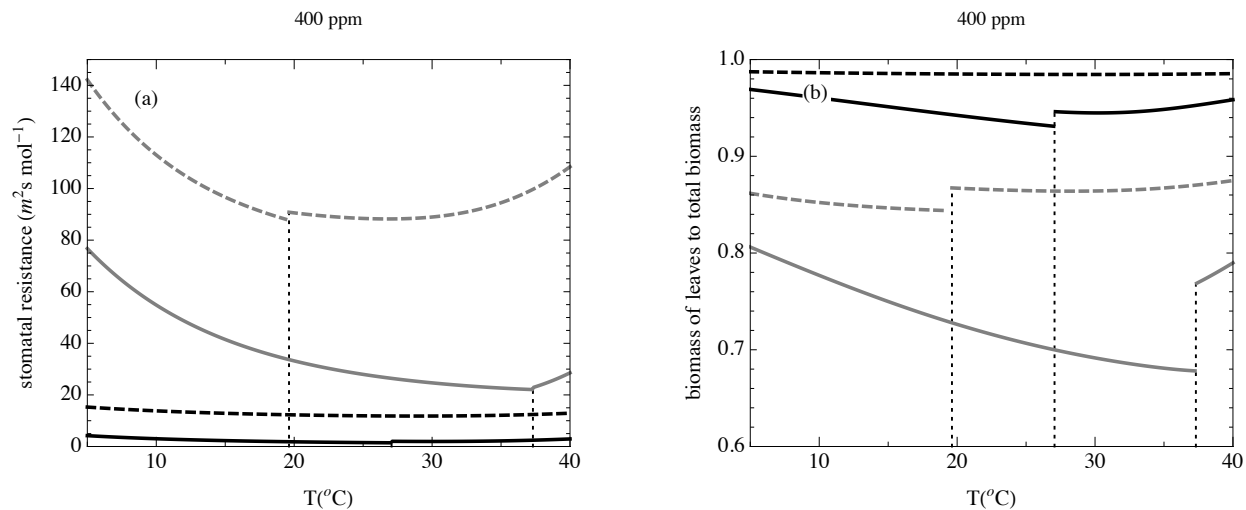

5

6 Fig. 5. Stomatal resistance ( $r_s$ ) and leaf/fine-root allocation ( $f$ ) as a function of temperature, with  
 7  $J_{max}/V_{cmax}=2.1$  for both  $C_3$  and  $C_4$  with saturated light under  $CO_2$  of 400 ppm and different water  
 8 conditions. Solid black line:  $C_3$  with VPD=0.15kPa,  $\Psi_S=0$  MPa; dashed black line:  $C_4$  with  
 9 VPD=0.15kPa,  $\Psi_S=0$ ; solid grey line:  $C_3$  with VPD=4 kPa,  $\Psi_S=-2$  MPa; dashed grey line:  $C_4$  with VPD=4  
 10 kPa,  $\Psi_S=-2$  MPa. Vertical lines indicate transition from RuBP carboxylation limited condition to RuBP  
 11 regeneration limited condition for  $C_3$  and  $C_4$ .

12

### 13 Discussion

14 Our modeling results imply that the environmental selection for  $C_4$  evolution was in place during  
 15 the mid-Oligocene at warm, arid sites as water limitation acted as the primary selective pressure  
 16 to increase photorespiration when  $CO_2$  is above 400 ppm, and even up to 600 ppm. Under  
 17 saturated water conditions, there was little room for  $C_4$  to evolve 20-30 MYA as  $CO_2$  was likely  
 18 above 400 ppm (14, 33), and the ATP costs of the  $C_4$  mechanism is too high and photorespiration  
 19 in  $C_3$  plants too low. As water becomes more limited, however, the  $C_4$  advantage becomes

1 increasingly larger. Enhanced carbon gain under water limited conditions has been believed to be  
2 the selective force behind the evolution of C<sub>4</sub> in dicotyledonous plants (2) and more recently, in  
3 accordance with phylogenetic evidence, in grasses (7, 16). Molecular-based evidence supports a  
4 mid-Oligocene evolution of C<sub>4</sub> in some grass and eudicot lineages, and our results suggest the  
5 same (8, 18, 34). Lineages that evolved in C<sub>4</sub> during this period may have been predisposed to  
6 exist as arid-land, saline, or disturbed-site specialists as we see today in most C<sub>4</sub> eudicots and the  
7 earliest known grass subfamily in which C<sub>4</sub> evolved, the Chloridoideae (8, 35).

8  
9 As CO<sub>2</sub> decreased through the Miocene, warm temperatures remained a strong selective force,  
10 but the main selective force for C<sub>4</sub> evolution shifted from water limitation to low CO<sub>2</sub> and, to a  
11 lesser extent, light intensity. Since increased light intensity alone could not lead to advantage of  
12 C<sub>4</sub> under high CO<sub>2</sub> (Fig. 3c), it seems likely that C<sub>4</sub> grasses could not dominate open grasslands,  
13 except in locally arid areas, while CO<sub>2</sub> was still high. So between the initial evolutionary events  
14 leading to the emergence of C<sub>4</sub> and the large-scale expansion within the grasses 5-10 MYA, C<sub>4</sub>  
15 grass radiation likely idled in small pockets of selective favorability as CO<sub>2</sub> concentrations  
16 declined through the Miocene (2, 8). As CO<sub>2</sub> declined, the high light levels inherent to grassland  
17 systems gave C<sub>4</sub> photosynthesis an increasing advantage, leading to broader geographic and  
18 evolutionary radiation. Our results are consistent with previous studies showing that low CO<sub>2</sub>  
19 (200-300 ppm) strongly favors C<sub>4</sub> over C<sub>3</sub> photosynthesis (e.g. 9, 15). And we further show that  
20 low CO<sub>2</sub> provides a clear C<sub>4</sub> advantage under a large range of water availability and light  
21 intensity regimes. The greatest C<sub>4</sub> advantage occurs, however, in relatively moist and mildly  
22 water-limited conditions; opposite to that which is seen under high CO<sub>2</sub> (Fig. 2c). The  
23 environmental conditions that lead to the largest C<sub>4</sub> advantage within our model therefore  
24 perfectly parallels those documented in the 20<sup>th</sup> century, C<sub>4</sub>-dominated grasslands: highly  
25 seasonal precipitation that occurs chiefly within a warm growing season (36, 37, 38). These are  
26 also similar to the conditions that led to the large-scale expansion of C<sub>4</sub> grasslands in the

1 Miocene, for example the onset of summer monsoons and subsequent C<sub>4</sub> grassland expansion in  
2 the Indian subcontinent (39).  
3  
4 The potential role of water limitation to play a central role C<sub>4</sub> grass evolution has sparked interest  
5 in grass hydraulics and the anatomical shifts in C<sub>3</sub> grasses that were prerequisites to C<sub>4</sub> evolution  
6 (24, 22, 40). The modeling effort of Osborne and Sack (22) suggests a hydrological underpinning  
7 to the evolution of C<sub>4</sub> grasses, but found a much smaller environmental window for C<sub>4</sub> evolution  
8 than we did. At 400 ppm CO<sub>2</sub> and soil water potential of -1 MPa— a common occurrence in  
9 grasslands (41)— they showed that C<sub>4</sub> hydraulic conductance must be twice that of C<sub>3</sub> grasses  
10 for C<sub>4</sub> grasses to achieve slightly greater carbon uptake. In contrast, we find a clear C<sub>4</sub> advantage  
11 under these, and even drier, conditions by allowing for optimal solutions of stomatal  
12 conductance and leaf/fine-root ratio to maximize photosynthesis. Plant hydraulic conductance  
13 was kept equal across C<sub>3</sub> and C<sub>4</sub> throughout simulations, and increasing hydraulic conductance  
14 had little impact on our major results and conclusion (Fig. S4, S5), the implication being that the  
15 C<sub>4</sub> pathway itself is enough to result in greater carbon gain under water stress without any  
16 required increase in hydraulic conductance. These results do not necessarily contradict the idea  
17 that larger bundle sheaths and smaller interveinal distance— which were clear prerequisites for  
18 C<sub>4</sub> evolution (24, 42) — led to greater hydraulic conductance and drought tolerance among C<sub>3</sub>  
19 grass progenitors (24), but they do suggest that greater hydraulic conductance is not necessary to  
20 give C<sub>4</sub> plants an advantage once the carbon-concentrating mechanism evolved. In fact, we  
21 hypothesize that once C<sub>4</sub> evolves in a lineage, selection on increased hydraulic conductance  
22 would not only lessen, but invert, leading to the development of even narrower xylem conduits  
23 and greater drought resistance. There is some empirical support for such a prediction in eudicots  
24 (43).  
25  
26 We assumed that during the early evolution of C<sub>4</sub>, both C<sub>3</sub> and C<sub>4</sub> plants had a similar balance of  
27 nitrogen across the light and dark reactions, and that the allocation of nitrogen could be treated

1 separately from the evolution of the C<sub>4</sub> CCM as a target of selection. We propose that different  
2 environmental conditions can select for a shift in the degree of reallocation (assessed here by a  
3 change in  $J_{max}/V_{cmax}$ ) both through evolutionary time and across species in extant plants. In  
4 general, CCMs allow for less investment in nitrogen-rich Rubisco (44), and the nitrogen not used  
5 for Rubisco could be either reinvested in light harvesting machinery, or simply not used at all;  
6 thus reducing the plant nitrogen requirement. Modeling studies have long assumed a high  
7  $J_{max}/V_{cmax}$  for C<sub>4</sub> photosynthesis (22, 31, 45) and measurements show lower Rubisco content and  
8 higher chlorophyll and thylakoid content, giving evidence of reallocation in extant C<sub>4</sub> species  
9 (26, 27, 46). Empirical estimates of  $J_{max}/V_{cmax}$  in C<sub>4</sub> plants paint a more variable picture, ranging  
10 from 2 to above 6, with a mean of around 4.5 (47, 48, 49, 50, 51, 52), which is higher than the  
11 mean  $J_{max}/V_{cmax}$  estimates for C<sub>3</sub> plants of 2.1 (53). Increasing  $J_{max}/V_{cmax}$  almost always increases  
12 the photosynthesis rate of C<sub>4</sub> grasses (Fig. 4, Fig. S6), and therefore could lead to a competitive  
13 advantage over C<sub>3</sub> grasses as well as C<sub>4</sub> grasses that do not reallocate. Assuming there is little  
14 cost or no genetic constraints for reallocation, the selection pressure to reallocate would have  
15 been strongest when CO<sub>2</sub> was high, e.g. during the initial evolutionary events in the  
16 Oligocene/Miocene, when the CCM alone does not give C<sub>4</sub> a large advantage (Fig. 2 c, e, Fig. 3  
17 c). When CO<sub>2</sub> was low during the C<sub>4</sub> radiation 5-10 MYA, however, the CCM alone would give  
18 C<sub>4</sub> an advantage and reallocation would not change the competitive balance between C<sub>3</sub> and C<sub>4</sub>  
19 (Fig. 2 a and Fig. 3a). As CO<sub>2</sub> remained low through to the Pleistocene, selection for nitrogen  
20 reallocation to the light reactions would lessen further, especially during the CO<sub>2</sub> minima of the  
21 Pleistocene glacial periods (~ 180 ppm). In this context, an interesting question is how the  
22 evolutionary picture of  $J_{max}$  and  $V_{cmax}$  allocation was coordinated with the formation of C<sub>4</sub>  
23 pathway in response to the high CO<sub>2</sub> in Oligocene, to the CO<sub>2</sub> decrease through Pleistocene and,  
24 further, to the increase of CO<sub>2</sub> in the last 150 years.

25

26 C<sub>4</sub> photosynthesis first evolved 25 – 32 MYA, and many subsequent and independent  
27 evolutionary origins occurred through to the Pleistocene 2.8 MYA. Each evolutionary origin



1 represents both different selective pressures and taxonomic (genetic) constraints as climate and  
2 CO<sub>2</sub> changed. Taking the Chloridoideae as an example, we can use our model to develop  
3 hypotheses along the evolutionary trajectory of C<sub>4</sub> in this grass subfamily. The initial evolution  
4 of C<sub>4</sub> photosynthesis 25 – 32 MYA while CO<sub>2</sub> was high was driven by aridity, acting to decrease  
5 stomatal conductance that increased photorespiration in C<sub>3</sub> progenitors initially, and led to higher  
6 water use efficiency upon the evolution of the CCM. There would have been enough of a  
7 reduction in water use that selection for increased hydraulic conductance would relax, allowing  
8 for the development of more resilient— and less conductive— xylem. Also at this point, there  
9 would have been strong selection for reallocation of nitrogen from the dark reactions to the light  
10 reactions. The large radiation of C<sub>4</sub> within the Chloridoideae that occurred 5 – 10 MYA was  
11 likely driven by low CO<sub>2</sub> and high light, and the previously-evolved hydraulic resilience would  
12 lead to this subfamily becoming dry-site specialists observed in current-day distributions (35).  
13 There would have been much less selective pressure to reallocate N during the large radiation,  
14 but such a reorganization was likely already in place within the clade. In contrast, for the  
15 lineages that first evolved C<sub>4</sub> in the late Miocene (e.g. *Stipagrostis*, *Eriachne*, *Neurachne*), CO<sub>2</sub>  
16 would have been the primary impetus for C<sub>4</sub> evolution, but for these lineages there would have  
17 been little selection to reallocate nitrogen until the dawn of the industrial revolution. We would  
18 also expect these more recently evolved lineages to have greater hydraulic conductance than  
19 those of the Chloridoideae. By optimizing carbon gain over water loss, we developed a plausible  
20 physiological explanation for the early evolution of C<sub>4</sub> and further proposed hypotheses about  
21 how the variety of traits that comprise the C<sub>4</sub> syndrome developed in concert with the climate  
22 changes that occurred through the evolutionary trajectory (54). By selecting extant species within  
23 select lineages, these hypotheses can be examined empirically, ultimately providing an  
24 integrative view of the selection pressures that led to the current physiologies and distribution of  
25 C<sub>4</sub> plants.

26

## 27 **Materials and Methods**

## 1 ***Overview of the model***

2 We used different modeling scenarios to examine the advantage of C<sub>4</sub> photosynthesis for the  
3 initial origin, expansion and current distribution. Initially, we assume that the CCM is the only  
4 difference between C<sub>3</sub> and C<sub>4</sub>. This comparison corresponds to two closely related species whose  
5 other traits have not had time to diverge in response to differential selection pressures. We then  
6 examine shifts in N allocation between the light and dark reactions of C<sub>4</sub>, which may have  
7 happened in subsequent divergence of C<sub>3</sub> and C<sub>4</sub> after the CCM evolved.

8  
9 The soil-plant-air water continuum was incorporated in C<sub>3</sub> photosynthesis models (55) and C<sub>4</sub>  
10 models (29) to examine interactions of CO<sub>2</sub>, water availability, light and temperature. We used  
11 the optimality approach of Givnish (1986) (56), where C<sub>3</sub> and C<sub>4</sub> plants optimize stomatal  
12 resistance and leaf/fine-root allocation to balance carbon gain and water loss. A full model  
13 description is in SI in supporting information with Table S1 for parameter abbreviation and  
14 Table S2 for input parameters. The model derivation using Mathematica (Wolfram Research,  
15 Inc.) and methods for numerical solutions are in SII.

## 16 17 ***Photosynthesis model***

18 We are using the traditional C<sub>3</sub> photosynthesis models (55) and C<sub>4</sub> models (29) for the  
19 photosynthesis modeling (SI in supporting information).

## 20 21 ***Hydraulic system***

22 At equilibrium, the rate of water loss through transpiration equals the rate of water absorption by  
23 the roots (56):

$$24 \quad \frac{EfN}{\rho} = k(1-f)N(\Psi_l - \Psi_s) \quad (1)$$

25 where  $\Psi_s$  is soil water potential,  $k$  is the effective root hydraulic conductivity,  $N$  is the total  
26 biomass of fine root and leaves,  $\rho$  is the leaf mass density (gcm<sup>-2</sup>) and  $E$  is the transpiration rate  
27 per leaf area.  $E$  could be written as  $\delta/r_s$ , where  $\delta$  is the water partial pressure deficit between

1 saturated leaf surface and the atmosphere. Thus, leaf water potential ( $\Psi_l$ ) is a function of  $r_s$  and  
 2 leaf/fine-root allocation ( $f$ , defined as investment into leaves/total investment in leaves and fine  
 3 root)).

$$4 \quad \Psi_l = \Psi_s - \frac{f\delta}{\rho k r_s (1-f)} \quad (2)$$

### 6 ***Inhibition of photosynthesis by water stress***

7 Reduced leaf water potential inhibits photosynthesis (57, 58, 59). We model this cost of  
 8 transpiration as Weibull-type vulnerability curves relating leaf  $\Psi_l$  and photosynthetic parameters  
 9 (45):

$$10 \quad V_{cmax,\Psi_l} = V_{cmax} e^{-\left(\frac{\Psi_l}{d_v}\right)^{b_v}} \quad (3)$$

$$11 \quad J_{max,\Psi_l} = J_{max} e^{-\left(\frac{\Psi_l}{d_j}\right)^{b_j}} \quad (4)$$

$$12 \quad V_{pmax,\Psi_l} = V_{pmax} e^{-\left(\frac{\Psi_l}{d_p}\right)^{b_p}}, \quad (5)$$

13 where  $b$  and  $d$  are curve fitting parameters. Since  $\Psi_l$  is a function of  $r_s$  and  $f$ , all those parameters  
 14 are functions of  $r_s$  and  $f$ .

### 16 ***Optimal stomatal resistance and optimal allocation of energy between leaves and fine roots***

17 We assume that the plant adjusts the  $r_s$  and  $f$  to optimize the total carbon gain by

$$18 \quad A_{total} = \frac{fNA_n}{\rho} \quad (6)$$

19 where  $\rho$  is the leaf mass density ( $\text{g cm}^{-2}$ ). As a simplifying assumption, we assume  $N$  and  $\rho$  are  
 20 fixed (similar to 56). Effectively, we consider the optimization problem faced by the plant in a  
 21 given instance during its growth, where its size (of which  $N$  is a proxy) can be regarded as a  
 22 constant. Clearly, during plant growth, the assimilate will be turned into plant biomass, but the  
 23 instantaneous optimization problem will still yield the optimal growth path as the growth rate is  
 24 maximized at any given time. Finally, we regard  $\rho$  as a species-specific trait that changes at a  
 25 slower time-scale than  $r_s$  and  $f$ . The first order optimality conditions for  $r_s$  and  $f$  are given by (56):

1 
$$\frac{\partial(fA_n)}{\partial r_s} = f \frac{\partial A_n}{\partial r_s} = 0 \quad (7)$$

2 
$$\frac{\partial(fA_n)}{\partial f} = A_n + f \frac{\partial A_n}{\partial f} = 0. \quad (8)$$

3 We checked the second order derivative to ensure that the numerical solutions to the first order  
4 conditions were maxima.

5

### 6 ***Allocation of nitrogen***

7 We examine how nitrogen allocation between RuBP carboxylation and RuBP regeneration in C<sub>4</sub>  
8 grasses affect competitive advantage over C<sub>3</sub> grasses. Despite great variation in  $V_{cmax}$  and  $J_{max}$   
9 based on the total leaf nitrogen content within C<sub>3</sub> plants, Wullschleger (1993) (53) found a mean  
10 of  $J_{max}/V_{cmax}=2.1$  across 109 C<sub>3</sub> species, which we use as a baseline for C<sub>3</sub> and C<sub>4</sub> pathways in  
11 analyzing the initial evolution of C<sub>4</sub>. Then, we used  $J_{max}/V_{cmax}=4.5$  for C<sub>4</sub> (22, 45) to analyze the  
12 role that nitrogen reallocation played in the evolutionary trajectory of C<sub>4</sub> plants. In determining  
13 the values of  $J_{max}$  and  $V_{cmax}$ , we used a simplified stoichiometry: we consider the total of  $J_{max}$  and  
14  $V_{cmax}$  as a constant to hold nitrogen concentration constant (22, 45). Two assumptions are  
15 underlying this simplified stoichiometry: (1) investing one molecule of nitrogen to the dark  
16 reactions will increase of  $V_{cmax}$  equal to the increase of  $J_{max}$  by investing one molecule of  
17 nitrogen to the light reactions; (2) nitrogen allocation to enzymes involved in photorespiration  
18 and the CCM balanced each other.

19

### 20 ***Modeling scenarios***

21 We modeled the photosynthesis rates of C<sub>3</sub> and C<sub>4</sub> under temperature range from 10 °C to 40 °C  
22 with an interval of 5 °C, under CO<sub>2</sub> mixing ratios ranging from 200 ppm to 600 ppm with an  
23 interval of 50 ppm, under different water conditions (VPD=0.001, 1, 2, 3, 4kPa corresponding to  
24 soil water potential ( $\Psi_s$ ) =0, -0.5, -1, -1.5, -2 MPa) and under different light intensities (1400,  
25 1000, 600, 200, 100  $\mu\text{mol photons m}^{-2}\text{s}^{-1}$ ). We consider VPD=0.001 kPa and  $\Psi_s$  =0 MPa as  
26 saturated water condition and light intensity of 1400  $\mu\text{mol photons m}^{-2}\text{s}^{-1}$  as an average saturated  
27 light intensity of a day.

## 1 Acknowledgements

2 We are grateful for support from the University of Pennsylvania.

3

## 4 References

- 5 1. Hatch MD (1987) C<sub>4</sub> photosynthesis: a unique blend of modified biochemistry, anatomy and ultrastructure. *Biochim. Biophys Acta* 895(2):81-106.
- 6 2. Sage RF (2004) The evolution of C<sub>4</sub> photosynthesis. *New Phytol* 161(2):341-370.
- 7 3. Grass Phylogeny Work. Group II (2012) New grass phylogeny resolves deep evolutionary relationships and  
8 discovers C<sub>4</sub> origins. *New Phytol* 193:304–12.
- 9 4. Still CJ, Berry JA, Collatz GJ, DeFries RS (2003) Global distribution of C<sub>3</sub> and C<sub>4</sub> vegetation: Carbon  
10 cycle implications. *Global Biogeochem Cycles* 17(1):1006.
- 11 5. Ehleringer JR, Monson RK (1993) Evolutionary and ecological aspects of photosynthesis pathway  
12 variation. *Annu Rev Ecol Syst* 24:411-439. DOI: 10.1146/annurev.es.24.110193.002211.
- 13 6. Edwards EJ, Smith SA (2010) Phylogenetic analyses reveal the shady history of C<sub>4</sub> grasses. *Proc Natl Acad*  
14 *Sci USA* 107(6):2532-2537.
- 15 7. Pau S, Edwards EJ, Still CJ (2013) Improving our understanding of environmental controls on the  
16 distribution of C<sub>3</sub> and C<sub>4</sub> grasses. *Glob Chang Biol* 19(1):184-196.
- 17 8. Christin PA, Besnard G, Samaritani E, Duvall MR, Hodkinson TR, Savolainen V, Salamin N (2008)  
18 Oligocene CO<sub>2</sub> decline promoted C<sub>4</sub> photosynthesis in grasses. *Curr Biol* 18(1):37-43.
- 19 9. Ehleringer JR, Cerling TE, Helliker BR (1997) C<sub>4</sub> photosynthesis, atmospheric CO<sub>2</sub>, and climate.  
20 *Oecologia* 112(3):285-299.
- 21 10. Collatz GJ, Berry JA, Clark JS (1998) Effects of climate and atmospheric CO<sub>2</sub> partial pressure on the global  
22 distribution of C<sub>4</sub> grasses: present, past, and future. *Oecologia* 114(4):441-454.
- 23 11. Ghannoum O (2009) C<sub>4</sub> photosynthesis and water stress. *Ann Bot* 103(4):635–644.
- 24 12. Taylor SH, Ripley BS, Martin T, De-Wet L-A, Woodward FI, Osborne CP (2014) Physiological advantages  
25 of C<sub>4</sub> grasses in the field: a comparative experiment demonstrating the importance of drought. *Glob Change*  
26 *Biol* 20(6):1922-2003.
- 27 13. Edwards EJ, Still CJ (2008) Climate, phylogeny and the ecological distribution of C<sub>4</sub> grasses. *Ecol Lett*  
28 11(3):266-276.
- 29 14. Royer DL (2014) Atmospheric CO<sub>2</sub> and O<sub>2</sub> during the Phanerozoic: tools, patterns and impacts. In: Treatise  
30 on Geochemistry, 2nd edition, Eds: H. Holland and K. Turekian.  
31 <http://dx.doi.org/10.1016/B978-0-08-095975-7.01311-5>.
- 32 15. Way DA, Katul GG, Manzoni S, Vico G (2014) Increasing water use efficiency along the C<sub>3</sub> to C<sub>4</sub>  
33 evolutionary pathway: a stomatal optimization perspective. *J Exp Bot* 65(13):3683-3693.
- 34 16. Edwards EJ, Osborne CP, Strömberg CAE, Smith SA, C<sub>4</sub> Grasses Consortium (2010) The Origins of C<sub>4</sub>  
35 Grasslands: Integrating Evolutionary and Ecosystem Science. *Science* 328(5978):587-591.
- 36 17. Kadereit G, Ackerly D, Pirie MD (2012) A broader model for C<sub>4</sub> photosynthesis evolution in plants  
37 inferred from the goosefoot family (Chenopodiaceae ss). *Proc R Soc Lond B Biol Sci* 279(1741):  
38 3304-3311.
- 39

- 1 18. Vicentini A, Barber JC, Aliscioni SS, Giussani LM, Kellogg EA (2008) The age of the grasses and clusters  
2 of origins of C<sub>4</sub> photosynthesis. *Glob Change Biol* 14(12):2963-2977.
- 3 19. Pagani M, Freeman KH, Arthur MA (1999) Late Miocene atmospheric CO<sub>2</sub> concentrations and the  
4 expansion of C<sub>4</sub> grasses. *Science* 285(5429):876-879.
- 5 20. Osborne CP (2008) Atmosphere, ecology and evolution: what drove the Miocene expansion of C<sub>4</sub>  
6 grasslands? *J Ecol* 96(1):35-45.
- 7 21. Strömberg CAE (2011) Evolution of grasses and grassland system. *Annu Rev Earth Planet Sci* 39:517-544.  
8 DOI:10.1146/annurev-earth-040809-152402.
- 9 22. Osborne CP, Sack L (2012) Evolution of C<sub>4</sub> plants: a new hypothesis for an interaction of CO<sub>2</sub> and water  
10 relations mediated by plant hydraulics. *Philos Trans R Soc Lond B Biol Sci* 367(1588):583-600.
- 11 23. Sage RF, Sage TL, Kocacinar F (2012) Photorespiration and the evolution of C<sub>4</sub> photosynthesis. *Annu Rev*  
12 *Plant Biol* 63:19-47. DOI:10.1146/annurev-arplant-042811-105511.
- 13 24. Griffiths H, Weller G, Toy L, Dennis RJ (2012) You're so vein: bundle sheath physiology, phylogeny and  
14 evolution in C<sub>3</sub> and C<sub>4</sub> plants. *Plant Cell Environ* 36(2):249-261.
- 15 25. Osborne CP, Freckleton RP (2009) Ecological selection pressures for C<sub>4</sub> photosynthesis in the grasses. *Proc*  
16 *Biol Sci* 276(1663):1753-1760.
- 17 26. Tissue DT, Griffin KL, Thomas RB, Strain BR (1995) Effects of low and elevated CO<sub>2</sub> on C<sub>3</sub> and C<sub>4</sub>  
18 annuals. II. Photosynthesis and leaf biochemistry. *Oecologia* 101(1):21-28.
- 19 27. Ghannoum O, Evans JR, von Caemmerer S (2010) Nitrogen and water use efficiency of C<sub>4</sub> plants. In: *C<sub>4</sub>*  
20 *photosynthesis and related CO<sub>2</sub> concentrating mechanisms* (eds. Raghavendra, A.S. & Sage, R.F.). Springer  
21 Science, The Netherlands, Dordrecht, pp. 129-146.
- 22 28. Prentice IC, Dong N, Gleason SM, Maire V, Wright IJ (2014) Balancing the costs of carbon gain and water  
23 transport: testing a new theoretical framework for plant functional ecology. *Ecol Lett* 17(1):82-91.
- 24 29. von Caemmerer S (2000) *Biochemical models of photosynthesis*. In *Techniques in Plant Sciences*. CSIRO  
25 Publishing, Colingwood, Australia, pp 91-122.
- 26 30. Chen D-X, Coughenour MB, Knapp AK, Owensby CE (1994) Mathematical simulation of C<sub>4</sub> grass  
27 photosynthesis in ambient and elevated CO<sub>2</sub>. *Ecol Model* 73(1-2):63-80.
- 28 31. Collatz GJ, Ball JT, Grivet C, Berry JA (1992) Coupled photosynthesis-stomatal conductance model for  
29 leaves of C<sub>4</sub> plants. *Aust J Plant Physiol* 19(5):519-538.
- 30 32. Ehleringer J, Björkman O (1977) Quantum yields for CO<sub>2</sub> uptake in C<sub>3</sub> and C<sub>4</sub> plants. *Plant Physiol* 59(1):  
31 86-90.
- 32 33. Cerling TE, Harris JM, MacFadden BJ, Leakey MG, Quade J, Eisenmann V, Ehleringer JR (1997). Global  
33 vegetation change through the Miocene/Pliocene boundary. *Nature* 389(6647):153-158.
- 34 34. Christin PA, Osborne CP, Sage RF, Arakaki M, Edwards EJ (2011) C<sub>4</sub> eudicots are not younger than C<sub>4</sub>  
35 monocots. *J Exp Bot* 62(9):3171-3181.
- 36 35. Liu H, Edwards EJ, Freckleton RP, Osborne CP (2012) Phylogenetic niche conservatism in C<sub>4</sub>  
37 grasses. *Oecologia* 170(3):835-845.
- 38 36. Hattersley PW (1983) The distribution of C<sub>3</sub> and C<sub>4</sub> grasses in Australia in relation to climate. *Oecologia*  
39 57(1):113-128.
- 40 37. Vogel JC, Fuls A, Danin A (1986) Geographical and environmental distribution of C<sub>3</sub> and C<sub>4</sub> grasses in the  
41 Sinai, Negev, and Judean deserts. *Oecologia* 70(2): 258-265.

- 1 38. Paruelo JM, Lauenroth WK (1996) Relative abundance of plant functional types in grasslands and  
2 shrublands of North America. *Ecol Appl* 6(4):1212–1224.
- 3 39. Quade J, Cerling TE, Bowman JR (1989) Development of Asian monsoon revealed by marked ecological  
4 shift during the latest Miocene in northern Pakistan. *Nature* 342(6246):163–166.
- 5 40. Taylor SH, Franks PJ, Hulme SP, Spriggs E, Christin PA, Edwards EJ, Woodward FI, Osborne CP (2012)  
6 Photosynthetic pathway and ecological adaptation explain stomatal trait diversity amongst grasses. *New*  
7 *Phytol* 193(2):387–396.
- 8 41. Knapp AK, Briggs JM, Hartnett DC, L. Collins L (1998) Patterns and controls of aboveground net primary  
9 production in tallgrass prairie. *Grassland Dynamics: Long-Term Ecological Research in Tallgrass Prairie*  
10 eds Knapp AK, Briggs JM, Hartnett DC, L. Collins L (Oxford University Press, New York), pp 193–221.
- 11 42. Christin PA, Osborne CP, Chatelet DS, Columbus JT, Besnard G, Hodkinson TR, Garrison LM, Vorontsova  
12 MS, Edwards EJ (2013) Anatomical enablers and the evolution of C<sub>4</sub> photosynthesis in grasses. *Proc Natl*  
13 *Acad Sci USA* 110(4):1381–1386.
- 14 43. Kocacinar F, Sage RF (2003) Photosynthetic pathway alters xylem structure and hydraulic function in  
15 herbaceous plants. *Plant Cell Environ* 26(12):2015–2026.
- 16 44. Ku MSB, Schmitt MR, Edwards GE (1979) Quantitative determination of RuBP carboxylase-orygenase  
17 protein in leaves of several C<sub>3</sub> and C<sub>4</sub> plants. *J Exp Bot* 114(1):89–98.
- 18 45. Vico G, Porporato A (2008) Modelling C<sub>3</sub> and C<sub>4</sub> photosynthesis under water-stressed conditions. *Plant and*  
19 *Soil* 313(1):187–203.
- 20 46. Vogan PJ, Sage RF (2012) Effects of low atmospheric CO<sub>2</sub> and elevated temperature during growth on the  
21 gas exchange responses of C<sub>3</sub>, C<sub>3</sub>–C<sub>4</sub> intermediate, and C<sub>4</sub> species from three evolutionary lineages of  
22 C<sub>4</sub> photosynthesis. *Oecologia* 169(2):341–352.
- 23 47. Domingues TF, Martinelli LA, Ehleringer JR (2007) Ecophysiological traits of plant functional groups in  
24 forest and pasture ecosystems from eastern Amazônia, Brazil. *Plant Ecol* 193(1):101–112.
- 25 48. Massad RS, Tuzet A, Bethenod O (2007) The effect of temperature on C<sub>4</sub>-type leaf photosynthesis  
26 parameters. *Plant Cell Environ*, 30(9):1191–1204.
- 27 49. Grant RF, Flanagan LB (2007) Modeling stomatal and nonstomatal effects of water deficits on CO<sub>2</sub> fixation  
28 in a semiarid grassland. *J Geophys Res* 112, G03011, doi:10.1029/2006JG000302.
- 29 50. Kathilankal JC, Mozdzer TJ, Fuentes JD, McGlathery KJ, D'Odorico P, Ziemann JC (2011) Physiological  
30 responses of *Spartina alterniflora* to varying environmental conditions in Virginia  
31 marshes. *Hydrobiologia* 669(1):167–181.
- 32 51. Ye Z, Suggett DJ, Robakowski P, Kang H (2013) A mechanistic model for the photosynthesis-light  
33 response based on the photosynthetic electron transport of photosystem II in C<sub>3</sub> and C<sub>4</sub> species. *New Phytol*  
34 199(1):110–120.
- 35 52. Ge ZM, Zhang LQ, Yuan L, Zhang C (2014) Effects of salinity on temperature-dependent photosynthetic  
36 parameters of a native C<sub>3</sub> and a non-native C<sub>4</sub> marsh grass in the Yangtze Estuary, China. *Photosynthetica*,  
37 52(4):484–492.
- 38 53. Wullschlegel SD (1993) Biochemical limitations to carbon assimilation in C<sub>3</sub> plants - A retrospective  
39 analysis of the A/C<sub>i</sub> curves from 109 species. *J Exp Bot* 44(5):907–920.
- 40 54. Christin PA, Osborne CP (2014) Tansley Review. The evolutionary ecology of C<sub>4</sub> photosynthesis. *New*  
41 *Phytol*, 204(4):765–781.

- 1        55. Farquhar GD, Von Caemmerer S, Berry JA (1980) A biochemical model of photosynthetic carbon dioxide  
2            assimilation in leaves of 3-carbon pathway species. *Planta* 149(1):78–90.
- 3        56. Givnish TJ (1986) Optimal stomatal conductance, allocation of energy between leaves and roots, and the  
4            marginal cost of transpiration. In: *On the Economy of Plant Form and Function* (ed. Givnish TJ).  
5            Cambridge University Press, Cambridge, pp. 171–213.
- 6        57. Tezara W, Mitchell VJ, Driscoll SD, Lawlor DW (1999) Water stress inhibits plant photosynthesis by  
7            decreasing coupling factor and ATP. *Nature* 401(6756):914–917.
- 8        58. Lawlor DW, Cornic G (2002) Photosynthetic carbon assimilation and associated metabolism in relation to  
9            water deficits in higher plants. *Plant Cell Environ* 25(2):275–294.
- 10       59. Tang AC (2002) Photosynthetic oxygen evolution at low water potential in leaf discs lacking an epidermis.  
11            *Ann of Bot* 89(7):861–870.
- 12



## 1 Figure Legends

2 Fig. 1. Crossover temperatures of photosynthesis for C<sub>3</sub> and C<sub>4</sub> with the change of CO<sub>2</sub>  
3 concentration under different water conditions. Light intensity was 1400 μmol photons m<sup>-2</sup>s<sup>-1</sup> for  
4 all model runs.  $J_{\max}/V_{\text{cmax}}=2.1$  for C<sub>3</sub> and  $J_{\max}/V_{\text{cmax}}=4.5$  for C<sub>4</sub>. Solid black line: VPD=0.15kPa,  
5  $\Psi_S=0$  MPa; dashed black line: VPD=1kPa,  $\Psi_S=-0.5$  MPa; dot-dashed black line: VPD=2kPa,  
6  $\Psi_S=-1$  MPa; dotted black line: VPD=3 kPa,  $\Psi_S=-1.5$  MPa.

7  
8 Fig. 2. The total difference in CO<sub>2</sub> assimilation between C<sub>4</sub> and C<sub>3</sub> ( $A_n(C_4)-A_n(C_3)$ ) under various  
9 CO<sub>2</sub> (200 ppm, 400 ppm and 600 ppm) and water conditions under saturated light intensity (1400  
10 μmol photons m<sup>-2</sup>s<sup>-1</sup>).  $J_{\max}/V_{\text{cmax}}=2.1$  for C<sub>3</sub> and C<sub>4</sub> (a, c, e) and  $J_{\max}/V_{\text{cmax}}=2.1$  for C<sub>3</sub> and  
11  $J_{\max}/V_{\text{cmax}}=4.5$  for C<sub>4</sub> (b, d, f). Water limitation intensity is: 1: VPD =0.15 kPa,  $\Psi_S=0$  MPa; 2: 1.5  
12 kPa, -0.5MPa; 3: 2kPa, -1 MPa; 4: 3kPa, -1.5 MPa; 5: 4kPa, -2 MPa.

13  
14 Fig. 3. The total difference in CO<sub>2</sub> assimilation between C<sub>4</sub> and C<sub>3</sub> ( $A_n(C_4)-A_n(C_3)$ ) with  
15  $J_{\max}/V_{\text{cmax}}=2.1$  for C<sub>3</sub> and C<sub>4</sub> under various CO<sub>2</sub> (200 ppm, 400 ppm) and different light  
16 intensities (from 200 to 1400 μmol photons m<sup>-2</sup>s<sup>-1</sup>) with saturated water condition  
17 (VPD=0.15kPa,  $\Psi_S=0$  MPa) (a, c) and with  $J_{\max}/V_{\text{cmax}}=2.1$  for C<sub>3</sub> and  $J_{\max}/V_{\text{cmax}}=4.5$  for C<sub>4</sub> (b,  
18 d).

19  
20 Fig. 4. Assimilation rates of C<sub>3</sub> with  $J_{\max}/V_{\text{cmax}}=2.1$  (solid black line), C<sub>4</sub> with  $J_{\max}/V_{\text{cmax}}=2.1$   
21 (dashed black line) and C<sub>4</sub> with  $J_{\max}/V_{\text{cmax}}=4.5$  (dotted black line) under light intensity of 1400  
22 μmol photons m<sup>-2</sup>s<sup>-1</sup>, CO<sub>2</sub> of 400 ppm and different water limitation conditions. (a) saturated  
23 soils; (b) VPD=1kPa and  $\Psi_S=-0.5$  MPa; (c) VPD=2kPa and  $\Psi_S=-1$  MPa.

24  
25 Fig. 5. Stomatal resistance ( $r_s$ ) and leaf/fine-root allocation ( $f$ ) as a function of temperature, with  
26  $J_{\max}/V_{\text{cmax}}=2.1$  for both C<sub>3</sub> and C<sub>4</sub> with saturated light under CO<sub>2</sub> of 400 ppm and different water  
27 conditions. Solid black line: C<sub>3</sub> with VPD=0.15kPa,  $\Psi_S=0$  MPa; dashed black line: C<sub>4</sub> with

- 1 VPD=0.15kPa,  $\Psi_S=0$ ; solid grey line: C<sub>3</sub> with VPD=4 kPa,  $\Psi_S=-2$  MPa; dashed grey line: C<sub>4</sub>
- 2 with VPD=4 kPa,  $\Psi_S=-2$  MPa. Vertical lines indicate transition from RuBP carboxylation
- 3 limited condition to RuBP regeneration limited condition for C<sub>3</sub> and C<sub>4</sub>.
